# Supplementary material
Source: PubMed Central journal article supplement (PMC6817422)
Supplement: NIHMS1540898-supplement-Supplemental_Material.pdf [file NIHMS1540898-supplement-Supplemental_Material.pdf]

## SUPPLEMENTAL MATERIAL

### **Metabolic Syndrome and Risk of Ischemic Stroke in Atrial Fibrillation: Atherosclerosis Risk In Communities (ARIC) Study**

Joseph J. Decker MD,<sup>1</sup> Faye L. Norby MS,MPH,<sup>2</sup> Mary R. Rooney MPH,<sup>2</sup> Elsayed Z. Soliman MD,MSc,MS,<sup>3</sup> Pamela L. Lutsey PhD,<sup>2</sup> James S. Pankow PhD,<sup>2</sup> Alvaro Alonso MD,PhD,<sup>4</sup> Lin Y. Chen MD,MS.<sup>1</sup>

1. Cardiovascular Division, Department of Medicine, University of Minnesota, Minneapolis, MN, USA.
2. Division of Epidemiology and Community Health, School of Public Health, University of Minnesota, Minneapolis, Minnesota, USA
3. Department of Epidemiology and Prevention, Epidemiological Cardiology Research Center, Wake Forest School of Medicine, Winston-Salem, NC.
4. Department of Epidemiology, Rollins School of Public Health, Emory University, Atlanta, Georgia, USA

Conflicts of interest: None

All authors have read and approved the submitted manuscript, the manuscript has not been submitted elsewhere nor published elsewhere in whole or in part, except as an abstract.

Corresponding Author:

Joseph J. Decker, MD

Department of Medicine, University of Minnesota

420 Delaware St SE, MMC 284

Minneapolis, MN 55455

E-mail [deckerj@umn.edu](mailto:deckerj@umn.edu)

Phone: 651-341-1610 Fax: 612-625-3238

Cover Title: Metabolic Syndrome and Stroke in AF

Total number of tables and figures in supplemental material: 3 tables

Key Words: atrial fibrillation; metabolic syndrome; ischemic stroke; hypertension; diabetes; obesity; hypertriglyceridemia; high-density lipoprotein.

Subject Terms: atrial fibrillation; ischemic stroke

Word Count: 574

## Supplemental Tables:

**Supplemental Table I. Association of Metabolic Syndrome Components with Embolic Stroke in Participants with Atrial Fibrillation, Atherosclerosis Risk in Communities (ARIC) Study**

| Individual variables            | Absent  | HR (95% CI), <b>Model 1</b> | P-value | HR (95% CI), <b>Model 2</b> | P-Value | HR (95% CI), <b>Model 3</b> | P-Value |
|---------------------------------|---------|-----------------------------|---------|-----------------------------|---------|-----------------------------|---------|
| High Waist Circumference        | 1 (Ref) | 0.98<br>(0.55-1.72)         | 0.93    | 0.92<br>(0.52-1.65)         | 0.79    | 0.90<br>(0.50-1.61)         | 0.72    |
| High Triglycerides              | 1 (Ref) | 1.46<br>(0.87-2.45)         | 0.16    | 1.43<br>(0.83-2.45)         | 0.19    | 1.40<br>(0.82-2.38)         | 0.22    |
| Low HDL                         | 1 (Ref) | 1.67<br>(0.97-2.87)         | 0.06    | 1.60<br>(0.92-2.78)         | 0.10    | 1.61<br>(0.93-2.81)         | 0.09    |
| Elevated BP                     | 1 (Ref) | 1.31<br>(0.66-2.62)         | 0.44    | 1.32<br>(0.65-2.69)*        | 0.44    | 1.24<br>(0.62-2.52)*        | 0.54    |
| Elevated fasting plasma glucose | 1 (Ref) | 1.19<br>(0.68-2.08)         | 0.55    | 1.14<br>(0.64-2.02)**       | 0.65    | 1.14<br>(0.64-2.00)**       | 0.66    |

Model 1: Cox proportional hazards model adjusted for age, sex, race/center

Model 2: Cox proportional hazards model adjusted for age, sex, race/center and the remaining CHA<sub>2</sub>DS<sub>2</sub>-VASC variables of stroke/transient ischemic attack, heart failure, hypertension, diabetes, myocardial infarction, peripheral artery disease and also anticoagulation use.

Model 3: Cox proportional hazards model adjusted for age, sex, race/center and the remaining CHADS<sub>2</sub> variables of stroke/transient ischemic attack, heart failure, hypertension, diabetes and also anticoagulation use.

Ref indicates reference and HDL, High-density lipoprotein.

Ref for prehypertension includes participants without prehypertension or HTN

Ref for prediabetes includes participants without prediabetes or diabetes

- \*Not adjusted for hypertension
- \*\*Not adjusted for diabetes

**Supplemental Table II. Association of Metabolic Syndrome Components with Ischemic Stroke in Participants with Atrial Fibrillation, Atherosclerosis Risk in Communities (ARIC) Study, Sensitivity Analysis Fitting Fine-Gray Model**

| Individual variables            | Absent  | HR (95% CI), Model 1  | P-Value | HR (95% CI), Model 2  | P-Value |
|---------------------------------|---------|-----------------------|---------|-----------------------|---------|
| High Waist Circumference        | 1 (Ref) | 0.87<br>(0.58-1.31)   | 0.50    | 0.86<br>(0.57-1.29)   | 0.47    |
| High Triglycerides              | 1 (Ref) | 1.20<br>(0.81-1.78)   | 0.35    | 1.17<br>(0.79-1.73)   | 0.42    |
| Low HDL                         | 1 (Ref) | 1.44<br>(0.97-2.15)   | 0.07    | 1.44<br>(0.96-2.15)   | 0.08    |
| Elevated BP                     | 1 (Ref) | 1.27<br>(0.77-2.08)*  | 0.35    | 1.22<br>(0.75-2.00)*  | 0.42    |
| Elevated fasting plasma glucose | 1 (Ref) | 1.09<br>(0.72-1.63)** | 0.69    | 1.07<br>(0.72-1.61)** | 0.73    |

Model 1: Cox proportional hazards model adjusted for age, sex, race/center and the remaining CHA<sub>2</sub>DS<sub>2</sub>-VASc variables of stroke/transient ischemic attack, heart failure, hypertension, diabetes, myocardial infarction, peripheral artery disease and also anticoagulation use.

Model 2: Cox proportional hazards model adjusted for age, sex, race/center and the remaining CHADS<sub>2</sub> variables of stroke/transient ischemic attack, heart failure, hypertension, diabetes and also anticoagulation use.

Ref indicates reference and HDL, High-density lipoprotein.

Ref for prehypertension includes participants without prehypertension or HTN

Ref for prediabetes includes participants without prediabetes or diabetes

- \*Not adjusted for hypertension
- \*\*Not adjusted for diabetes

**Supplemental Table III. Association of HDL (Modeled as a Continuous Variable) with Ischemic Stroke in Participants with Atrial Fibrillation, Atherosclerosis Risk in Communities (ARIC) Study**

| Individual variables    | Absent  | HR (95% CI), <b>Model 1</b> | P-value | HR (95% CI), <b>Model 2</b> | P-Value | HR (95% CI), <b>Model 3</b> | P-Value |
|-------------------------|---------|-----------------------------|---------|-----------------------------|---------|-----------------------------|---------|
| HDL (per 1 SD increase) | 1 (Ref) | 0.91<br>(0.76-1.11)         | 0.35    | 0.95<br>(0.78-1.15)         | 0.61    | 0.95<br>(0.79-1.16)         | 0.63    |

Model 1: Cox proportional hazards model adjusted for age, sex, race/center

Model 2: Cox proportional hazards model adjusted for age, sex, race/center and the remaining CHA<sub>2</sub>DS<sub>2</sub>-VASc variables of stroke/transient ischemic attack, heart failure, hypertension, diabetes, myocardial infarction, peripheral artery disease and also anticoagulation use.

Model 3: Cox proportional hazards model adjusted for age, sex, race/center and the remaining CHADS<sub>2</sub> variables of stroke/transient ischemic attack, heart failure, hypertension, diabetes and also anticoagulation use.

Ref indicates reference and HDL, High-density lipoprotein.

Ref for prehypertension includes participants without prehypertension or HTN

Ref for prediabetes includes participants without prediabetes or diabetes

- \*Not adjusted for hypertension
- \*\*Not adjusted for diabetes
